# Supplementary material for: C. elegans Ring Finger Protein RNF-113 Is Involved in Interstrand DNA Crosslink Repair and Interacts with a RAD51C Homolog
Source: PubMed Central journal article supplement (PMC3610817; doi:10.1371/journal.pone.0060071), 2013-03-28

**Fig. S1**

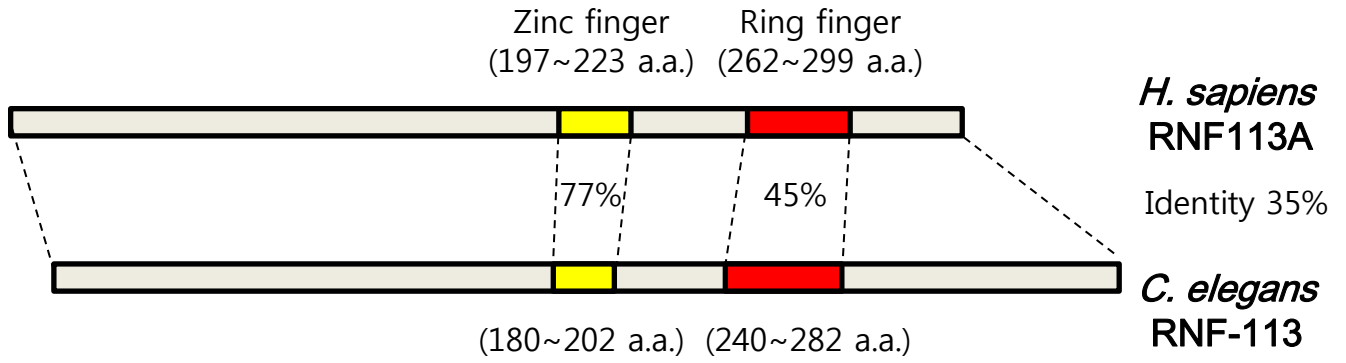

**Fig. S2**

**A**

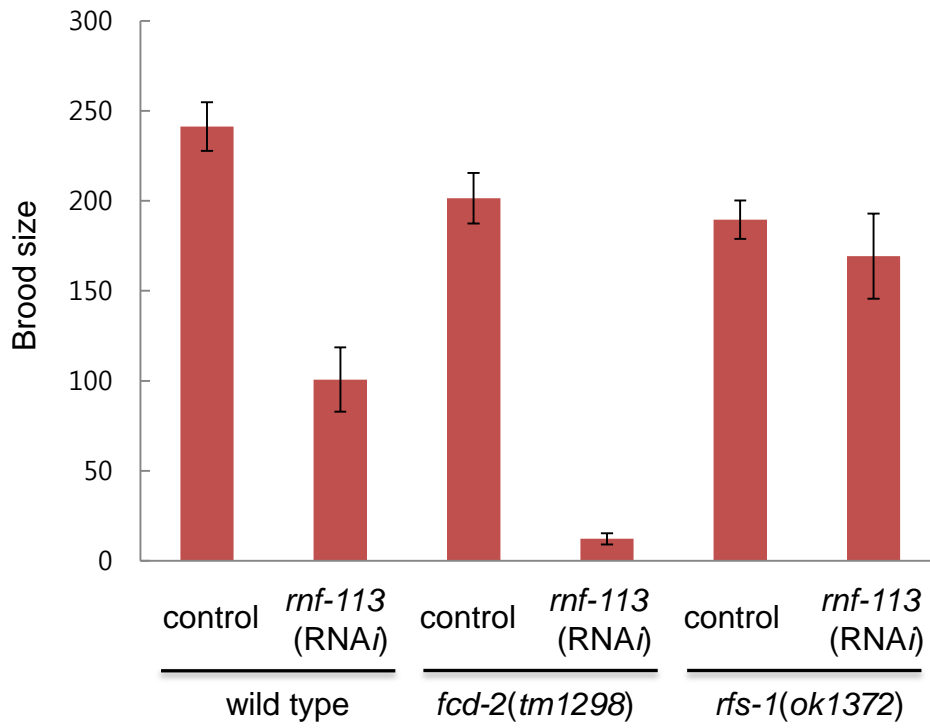

**B**

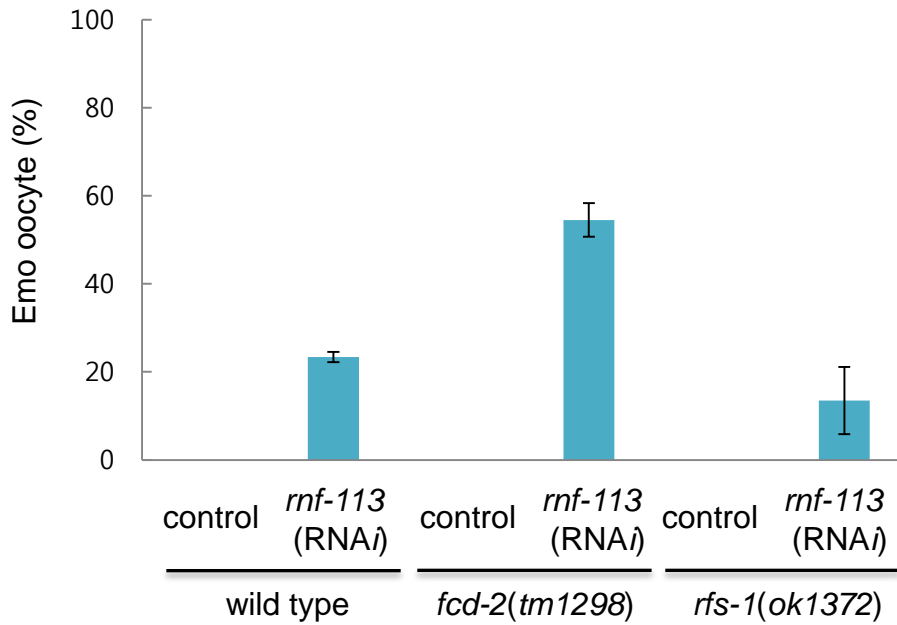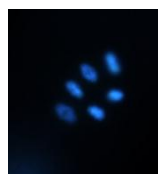

normal oocyte

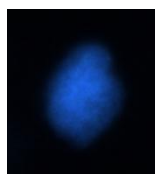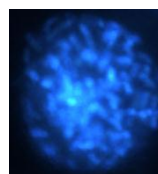

Emo oocytes

**Fig. S3**

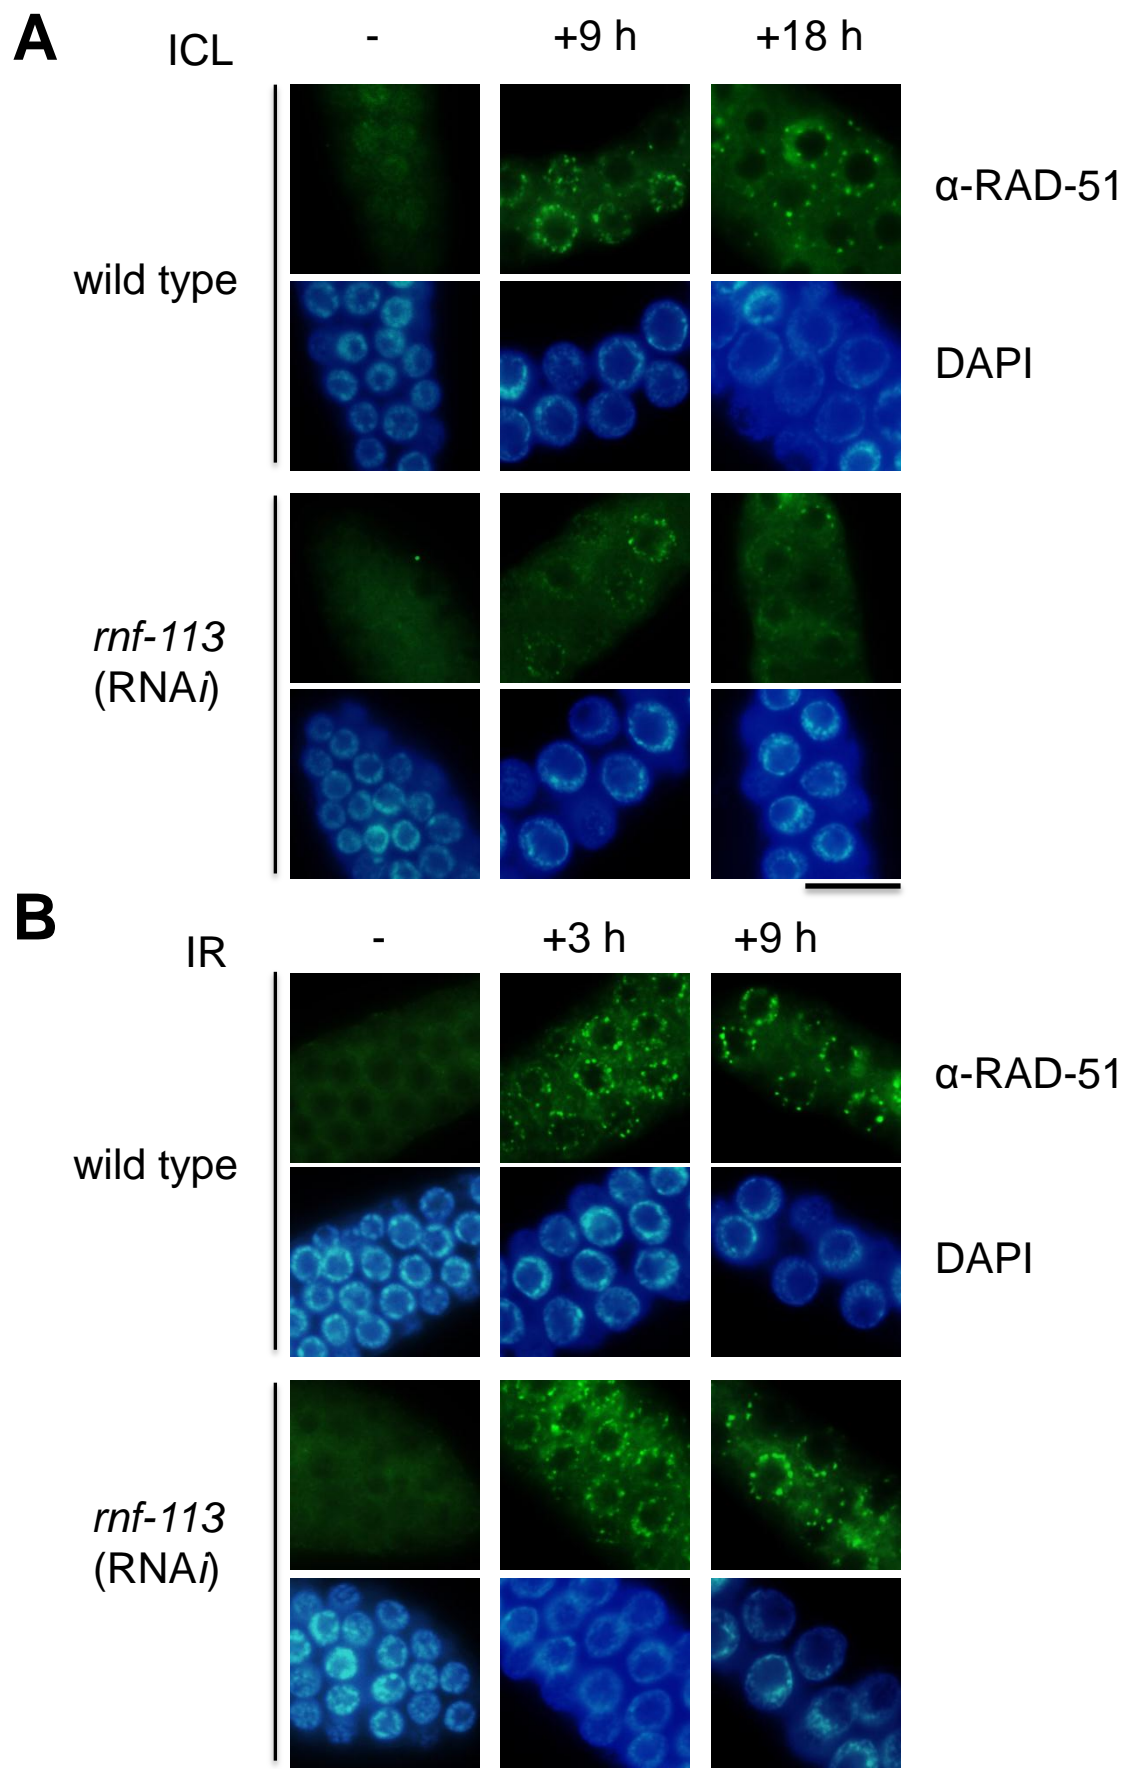

Fig. S4

**A**

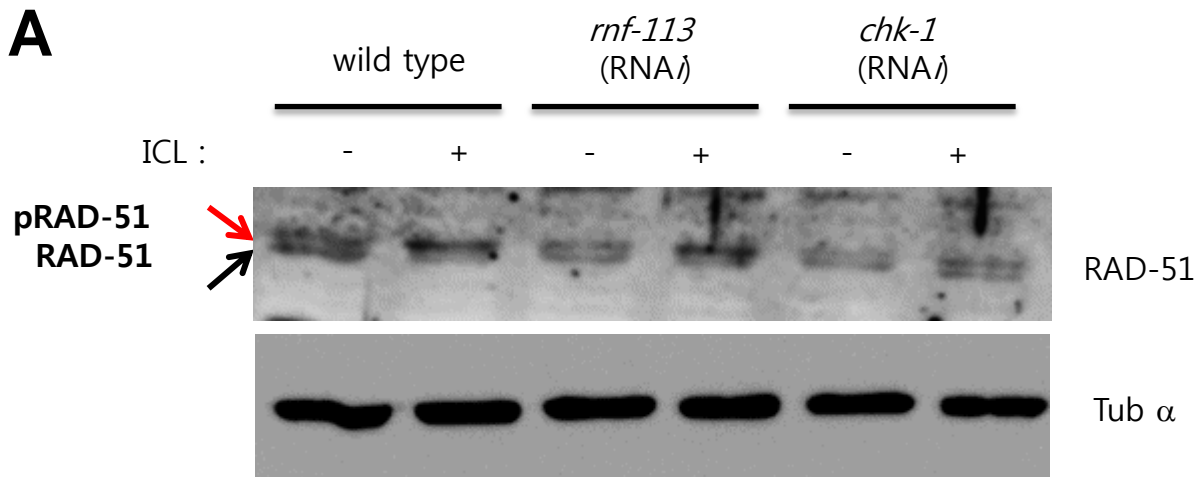

**B**

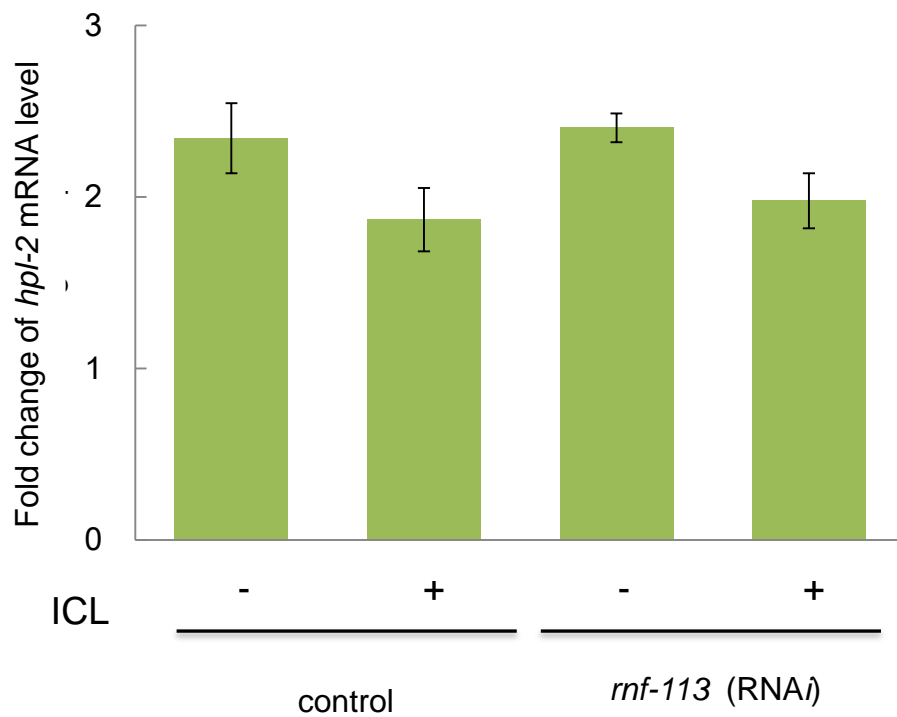



**Fig. S6**

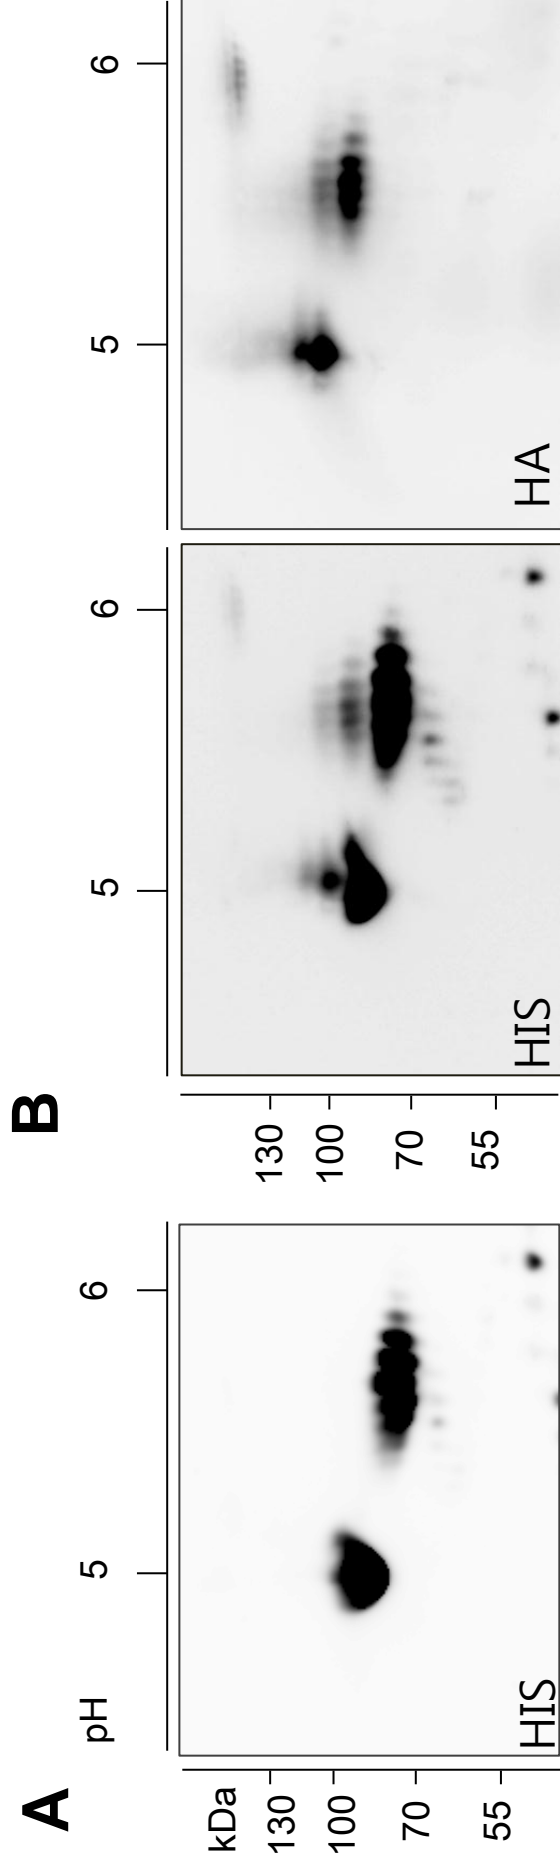

Supplement: pone.0060071.s001.pdf [file pone.0060071.s001.pdf]
